# Supplementary material
Source: PubMed Central journal article supplement (PMC3011177)
Supplement: NIHMS249184-supplement-Supplement1.pdf [file NIHMS249184-supplement-Supplement1.pdf]

## Supplementary Appendix

This appendix has been provided by the authors to give readers additional information about their work.

Supplement to: Peters SP, Kunselman SJ, Icitovic N, et al. Tiotropium bromide step-up therapy for adults with uncontrolled asthma. *N Engl J Med* 2010;363:1715-26. DOI: 10.1056/NEJMoa1008770.

**Tiotropium Bromide Step-Up Therapy for Adults with Uncontrolled Asthma  
On-Line Supplement**

**Table of Contents**

**Selected Methods**

**Study Patients**

**Outcome Measures**

**Selected Results**

**Schedule of Evaluations**

**Baseline Characteristics of TALC Randomized Subjects**

**Baseline Values for AM PEF, Asthma Control Days, and FEV<sub>1</sub> Before Each Treatment**

**Period**

**Results of All Outcome Variables**

**Reasons for Patient Withdrawals from TALC**

**Figure S1. Schedule of Evaluations**

**Table S1. Baseline Characteristics of TALC Randomized Subjects with All Data**

**Table S2. Baseline Values for AM PEF, Asthma Control Days, and FEV<sub>1</sub> Before Each**

**Treatment Period (V3, V7, and V11) for Each Treatment Sequence**

**Table S3. Results of All Outcome Variables**

**Table S4. Reasons for Patient Withdrawals from TALC**

22

23

## Selected Methods

### 24 Study Patients

25 Beginning in June 2007 we enrolled 826 patients into a common run-in period with the Best

26 Addjustment Strategy for Asthma over Long Term (BASALT) trial; 342 were randomized into

27 BASALT, 210 subjects were randomized to TALC, with the last subject completing TALC on May

28 21, 2010 . Inclusion criteria for enrollment in the common run-in period included male and

29 female subjects, ages 18 and older with a clinical history consistent with asthma,  $FEV_1 > 40\%$

30 predicted, asthma confirmed either by: (1) beta-agonist reversibility to 4 puffs albuterol  $\geq 12\%$

31 OR (2)  $PC_{20} FEV_1$  methacholine  $\leq 8$  mg/ml NOT on an inhaled corticosteroid, or  $\leq 16$  mg/ml ON

32 an inhaled corticosteroid, need for daily controller therapy (i.e., inhaled corticosteroids,

33 leukotriene modifiers, and/or long-acting beta-agonists) as shown by either: (1) used or

34 received prescription for asthma controller during past year OR (2) symptoms more than twice

35 a week if not on asthma controller, if on inhaled steroids (any drug at any dose not exceeding

36 the equivalent of 1000 mcg fluticasone daily), subject must have been on a stable dose for at

37 least 2 weeks, non-smoker (total lifetime smoking history  $< 10$  pack-years, no smoking for at

38 least 1 year), and ability to provide informed consent, as evidenced by signing a copy of the

39 consent form approved by the Committee on Human Research of the study institution, which

40 approved this study. Exclusion criteria included use of any prohibited drug including other

41 asthma medications or medications contraindicated in the study insert of study drugs,

42 significant medical illnesses or lung diseases other than asthma, vocal cord dysfunction,

43 respiratory tract infection or significant asthma exacerbation in the previous 4 weeks, history of

44 life-threatening asthma in the past 5 years, pregnant or not using acceptable birth control  
45 methods if of childbearing potential, hyposensitization therapy other than an established  
46 maintenance regimen, and inability to effectively use drug delivery devices used in the study.

47

#### 48 **Outcome Measures**

49 The predetermined primary outcome measure was morning peak flow (AM PEF).

50 Predetermined secondary outcomes included

- 51 1. additional measures of lung function (prebronchodilator FEV<sub>1</sub> measured in the morning  
52 at the end of the dosing interval for all drugs);
- 53 2. indices of asthma control and quality of life (asthma symptoms [scale 0 to 3, none, mild,  
54 moderate or severe], asthma-control days [days without any asthma symptoms or  
55 rescue albuterol use, except for preventative treatment for exercise], rescue inhaler use,  
56 asthma control assessed by the Asthma Control Questionnaire [ACQ, range 0-6, lower  
57 better asthma control, minimal clinically important difference (MID) 0.5],<sup>11,12</sup> Asthma  
58 Symptom Utility Index [ASUI, range 0-1, higher better asthma control, MID unknown but  
59 0.3 between mild/moderate and moderate/severe asthma],<sup>13</sup> and asthma-specific  
60 quality of life [AQLQ, range 1-7, higher better asthma QOL, MID 0.5],<sup>14</sup> coordinator and  
61 patient preference for study medications (ACRN – CPQ), asthma exacerbations  
62 [increased asthma symptoms which result in use of oral corticosteroids, increased  
63 inhaled corticosteroids, or additional medications for asthma], hospitalizations, ER visits,  
64 unscheduled visits to a medical provider, good asthma control defined by a composite  
65 index that takes into account measures of pulmonary function, asthma symptoms,

66 rescue beta-agonist use, need for additional asthma medications, and asthma  
67 exacerbations, similar to that used in the GOAL [Gaining Optimal Asthma Control]  
68 study;<sup>15</sup>

69 3. biomarkers of inflammation (exhaled nitric oxide [FENO], sputum  
70 eosinophilia/eosinophil cationic protein [ECP], and markers of oxidative stress [de-  
71 aerated pH] and inflammation in exhaled breath condensate.

72 Additional pre-specified exploratory hypotheses included associations of response variables  
73 with variants in genes in the beta-2 adrenergic receptor, the M<sub>3</sub> muscarinic receptor, and  
74 glucocorticoid pathways; whether bronchodilator reversibility with 4 puffs of albuterol or 4  
75 puffs of ipratropium bromide could predict positive responses to salmeterol and tiotropium  
76 respectively; and whether a lower resting heart rate (lowest quintile versus highest quintile),  
77 could predict a positive response to tiotropium bromide. Pre-specified also was a “responder  
78 analysis” similar to that used in previous CARE Network protocols.<sup>16,17</sup>

79

## 80 Selected Results

81

### 82 Schedule of Evaluations

83 **Figure S1** (Schedule of Evaluations) shows when various procedures were performed.

84

### 85 Baseline Characteristics of TALC Randomized Subjects

86 Baseline characteristics of TALC randomized subjects with all data presented are found in the  
87 Supplement **Table S1**.

88

**89 Baseline Values for AM PEF, Asthma Control Days, and FEV<sub>1</sub> Before Each Treatment Period**

90 Average (2 weeks before randomization) AM PEF was 377±117 L/min and proportion of ACDs

91 0.21±0.33 (2.97±4.64 days during the 2 weeks before randomization). Baselines before the

92 each of the 3 active treatment periods were the similar for AM PEF (377±117, 384±118,

93 383±115 L/min, respectively), and FEV<sub>1</sub> (2.31±0.77, 2.36±0.77, 2.36±0.75 L), while proportion of

94 ACDs increased from 0.21±0.33 to 0.34±0.40 and 0.34±0.41 before treatment periods 2 and 3.

95 While minimal carry-over effects were observed for measures of lung function, an effect was

96 seen for ACDs as shown in Supplement **Table S2 (Baseline Values for AM PEF, Asthma Control**

97 **Days, and FEV<sub>1</sub> Before Each Treatment Period (V3, V7, and V11) for Each Treatment**

98 **Sequence).**

99

**100 Results of All Outcome Variables**

101 The results of all outcome variables are found in the Supplement **Table S3.**

102

**103 Reasons for Patient Withdrawals from TALC**

104 Reasons for withdrawal of randomized subjects from the trial (7 tio/1xbecl, 14 2xbecl, 15

105 salm/1xbecl) are given in the Supplement **Table S4.** As can be seen in the Table, 23 of the 36

106 dropouts were due to a withdrawal of consent. As far as could be determined, no participant

107 withdrew from TALC because of the FDA advisory concerning tiotropium and stroke, with the

108 subsequent revision of the informed consent document, and appropriate counseling of study

109 participants.

110

**Figure S1. Schedule of Evaluations**

111

| Visit                          | 1a                    | 1b | 2                                       | 3 | 4 | 5  | 6  | 7                                       | 8  | 9  | 10 | 11                                      | 12 | 13 | 14       | 15 |
|--------------------------------|-----------------------|----|-----------------------------------------|---|---|----|----|-----------------------------------------|----|----|----|-----------------------------------------|----|----|----------|----|
| Week                           | 0                     | 0  | 2                                       | 4 | 8 | 13 | 18 | 20                                      | 24 | 29 | 34 | 36                                      | 40 | 45 | 50       | 52 |
| Study Phase                    | Open-Label ICS Run-In |    | 14-Week Double-Blind Treatment Period 1 |   |   |    |    | 14-Week Double-Blind Treatment Period 2 |    |    |    | 14-Week Double-Blind Treatment Period 3 |    |    | Wash out |    |
| Randomization                  |                       |    |                                         | X |   |    |    |                                         |    |    |    |                                         |    |    |          |    |
| Skin Testing                   |                       |    | X                                       |   |   |    |    |                                         |    |    |    |                                         |    |    |          |    |
| Heart Rate Assessment/AQLQ     |                       |    |                                         | X |   |    | X  | X                                       |    |    | X  | X                                       |    |    | X        |    |
| FENO/EBC/Sputum                |                       |    |                                         | X |   |    | X  |                                         |    |    | X  |                                         |    |    | X        |    |
| Spirometry                     | X                     | X  | X                                       | X | X | X  | X  | X                                       | X  | X  | X  | X                                       | X  | X  | X        | X  |
| Albuterol Reversal (4 puffs)   | (X)                   | X  |                                         | X |   |    | X  |                                         |    |    | X  |                                         |    |    | X        |    |
| Ipratropium Reversal (4 puffs) |                       |    | X                                       |   |   |    |    |                                         |    |    |    |                                         |    |    |          |    |
| Methacholine                   | (X)                   |    |                                         |   |   |    |    |                                         |    |    |    |                                         |    |    |          |    |
| ACQ/ASUI/Diary Data            |                       |    | X                                       | X | X | X  | X  | X                                       | X  | X  | X  | X                                       | X  | X  | X        | X  |

112

113 The TALC and BASALT trials were companion trials which used a common run-in period in order to maximize the use of patients with  
114 asthma: better controlled asthmatics were allocated to BASALT, and less well controlled asthmatics were allocated to TALC. This  
115 figure shows when various procedures were performed. Scores on the Asthma Control Questionnaire (ACQ) range between 0 and 6,  
116 with lower score indicating better asthma control; minimal clinically important difference (MID) is 0.5. Asthma Symptom Utility  
117 Index (ASUI) scores range between 0 and 1, with higher score indicating better asthma control; MID unknown but a difference of 0.3  
118 is suggested to distinguish between mild/moderate and moderate/severe asthma. Asthma-specific quality of life (AQLQ) scores  
119 range between 1 and 7, with higher score indicating better asthma quality of life; MID is 0.5. FENO refers to measuring the fraction of  
120 exhaled nitric oxide. EBC is the collection of exhaled breath condensate. Sputum refers to the induction and processing of induced  
121 sputum. Diary data include twice daily collection of asthma symptoms, PEF, and any other medications used. Subjects were  
122 required to have the diagnosis of asthma confirmed EITHER by bronchodilator reversibility testing to 4 puffs of albuterol OR by  
123 bronchial hyperresponsiveness to methacholine inhalation (hence the parentheses () around these two tests) in Visit 1a.

124  
125**Table S1. Baseline Characteristics of TALC Randomized Subjects with All Data**

| Characteristic                                                                        |                 |
|---------------------------------------------------------------------------------------|-----------------|
| Male †                                                                                | 69 (32.9%)      |
| Race †                                                                                |                 |
| American Indian/Alaskan Native                                                        | 1 (0.5%)        |
| Asian/Pacific Islander                                                                | 9 (4.3%)        |
| African American                                                                      | 59 (28.1%)      |
| Caucasian                                                                             | 115 (54.8%)     |
| Hispanic                                                                              | 24 (11.4%)      |
| Other                                                                                 | 2 (1.0%)        |
| Skin test atopic status (one or more skin tests positive) †                           | 175 (87.5%)     |
| Age at visit 1 *                                                                      | 210 42.2±12.3   |
| Duration of asthma (years since doctor first diagnosed) *                             | 210 26.1±14.1   |
| Height at visit 1 (cm) *                                                              | 210 167.8±9.5   |
| Weight at visit 1 (kg) *                                                              | 210 88.3±25.3   |
| BMI at visit 1 (kg/m <sup>2</sup> ) *                                                 | 210 31.4±8.8    |
| Pre-Bronchodilator FEV <sub>1</sub> at visit 3 (liters) *                             | 210 2.31±0.77   |
| Pre-Bronchodilator FEV <sub>1</sub> at visit 3 (% predicted) *                        | 210 71.5±14.9   |
| FEV <sub>1</sub> Albuterol (4 puffs) Reversal at visit 3 (%) *                        | 210 14.9±9.8    |
| FEV <sub>1</sub> Post-Albuterol (4 puffs) at visit 3 (liters) *                       | 210 2.64±0.82   |
| FEV <sub>1</sub> Ipratropium (4 puffs) Reversal at visit 2 (%) *                      | 202 12.43±9.48  |
| FEV <sub>1</sub> Post-Ipratropium (4 puffs) at visit 2 (liters) *                     | 202 2.62±0.80   |
| AM Peak Flow 2-week average prior to visit 3 (liters/min) *                           | 210 377.2±117.0 |
| PM Peak Flow 2-week average prior to visit 3 (liters/min) *                           | 210 383.6±119.0 |
| Peak Flow Variability 2-week average prior to visit 3 (%) *                           | 210 0.29±6.87   |
| Daily Symptoms 2-week average prior to visit 3 (0 to 3 scale) *                       | 210 0.46±0.44   |
| Nighttime Symptoms (AM Symptom Diary) 2-week average prior to visit 3 *               | 210 0.41±0.45   |
| Daytime Symptoms (PM Symptom Diary) 2-week average prior to visit 3 *                 | 210 0.50±0.46   |
| Albuterol Rescue Use 2-week average prior to visit 3 (puffs/day) *                    | 208 1.71±2.09   |
| Albuterol Rescue Use 2-week average prior to visit 3 (times dosed/day) *              | 208 1.01±1.22   |
| Asthma control days 2-week average prior to visit 3 (proportion of controlled days) * | 210 0.212±0.331 |
| Asthma control days 2-week sum prior to visit 3 (# of controlled days) *              | 210 2.97±4.64   |
| Shortened (without FEV <sub>1</sub> % predicted) ACQ Average at visit 3 *             | 210 1.36±0.84   |

| <b>Characteristic</b>                           |                         |
|-------------------------------------------------|-------------------------|
| ACQ Average at visit 3 *                        | 210 1.64±0.73           |
| AQLQ Average at visit 3 *                       | 205 5.43±1.05           |
| ASUI Score at visit 3 *                         | 210 0.78±0.15           |
| IgE at visit 2 (IU/mL) ^                        | 199 114.5 (1.4)         |
| FENO at visit 3 (ppb) ^                         | 201 18.8 (0.7)          |
| Sputum over-read Eosinophils at visit 3 +       | 154 0.40 (0.00,1.20)    |
| Exhaled Breath Condensate pH at visit 3 +       | 196 8.53 (8.27,8.66)    |
| Blood EOS at visit 2 (/mm <sup>3</sup> ) +      | 200 182.0 (100.0,273.0) |
| Ventricular Heart Rate at visit 3 (beats/min) + | 209 66.0 (59.0,75.0)    |
| <b>Medication Use (Ever Taken) †</b>            |                         |
| Inhaled Corticosteroids (ICS)                   | 189 (90.0%)             |
| Oral Steroids                                   | 141 (68.8%)             |
| Long-Acting Beta Agonist (LABA)                 | 163 (78.7%)             |
| Leukotriene Receptor Antagonist (LTRA)          | 89 (42.8%)              |
| Non-long-acting Beta-Agonists                   | 199 (95.2%)             |
| Asthma Medications via Nebulizer                | 156 (75.7%)             |
| Oral Beta-2 Agonists                            | 34 (16.8%)              |
| Oral Theophylline                               | 49 (24.6%)              |
| Inhaled Anticholinergic Medications             | 48 (24.0%)              |
| IgE Blocker (anti-IgE)                          | 2 (1.0%)                |
| † N (%) reported                                |                         |
| * N Mean±SD reported                            |                         |
| + N Median (Q1,Q3) reported                     |                         |
| ^ N Geometric mean (CV) reported                |                         |

126

127 The run-in medication was beclomethasone HFA 40 mcg 2 puffs bid. If a patient was using  
128 other asthma medications at the onset of the run-in, these were stopped. Scores for Daily  
129 Symptoms were on a scale from 0 to 3 (0 – none, 1 – mild, 2 – moderate, 3 – severe). Scores on  
130 the Asthma Control Questionnaire (ACQ) range between 0 and 6, with lower score indicating  
131 better asthma control; minimal clinically important difference (MID) is 0.5. Asthma Symptom  
132 Utility Index (ASUI) scores range between 0 and 1, with higher score indicating better asthma  
133 control; MID unknown but a difference of 0.3 is suggested to distinguish between  
134 mild/moderate and moderate/severe asthma. Asthma-specific quality of life (AQLQ) scores  
135 range between 1 and 7, with higher score indicating better asthma quality of life; MID is 0.5.

136

137

**Table S2. Baseline Values for AM PEF, Asthma Control Days, and FEV<sub>1</sub> Before Each Treatment Period (V3, V7, and V11) for Each Treatment Sequence**

|                                                        | <b>Drug Sequence</b>                 | <b>Visit 3 Value (SE)</b> | <b>Visit 7 Value (SE)</b> | <b>Visit 11 Value (SE)</b> |
|--------------------------------------------------------|--------------------------------------|---------------------------|---------------------------|----------------------------|
| AM Peak Flow (liters/min)                              | tio/1xbecl0 → 2xbecl0 → salm/1xbecl0 | 388.9 (7.9)               | 411.2 (7.8)               | 394.4 (6.4)                |
|                                                        | tio/1xbecl0 → salm/1xbecl0 → 2xbecl0 | 439.2 (10.6)              | 446.2 (9.2)               | 439.2 (9.5)                |
|                                                        | 2xbecl0 → tio/1xbecl0 → salm/1xbecl0 | 299.3 (8.0)               | 323.7 (8.3)               | 340.6 (8.6)                |
|                                                        | 2xbecl0 → salm/1xbecl0 → tio/1xbecl0 | 364.6 (8.6)               | 352.4 (8.4)               | 358.1 (9.1)                |
|                                                        | salm/1xbecl0 → tio/1xbecl0 → 2xbecl0 | 382.4 (7.7)               | 382.2 (8.6)               | 390.7 (8.1)                |
|                                                        | salm/1xbecl0 → 2xbecl0 → tio/1xbecl0 | 401.3 (8.5)               | 406.1 (10.4)              | 392.5 (9.2)                |
| Asthma control days (proportion of controlled days)    | tio/1xbecl0 → 2xbecl0 → salm/1xbecl0 | 0.214 (0.040)             | 0.403 (0.050)             | 0.459 (0.048)              |
|                                                        | tio/1xbecl0 → salm/1xbecl0 → 2xbecl0 | 0.199 (0.043)             | 0.648 (0.047)             | 0.623 (0.049)              |
|                                                        | 2xbecl0 → tio/1xbecl0 → salm/1xbecl0 | 0.145 (0.042)             | 0.258 (0.053)             | 0.225 (0.052)              |
|                                                        | 2xbecl0 → salm/1xbecl0 → tio/1xbecl0 | 0.178 (0.041)             | 0.398 (0.049)             | 0.393 (0.050)              |
|                                                        | salm/1xbecl0 → tio/1xbecl0 → 2xbecl0 | 0.237 (0.042)             | 0.462 (0.051)             | 0.437 (0.054)              |
|                                                        | salm/1xbecl0 → 2xbecl0 → tio/1xbecl0 | 0.146 (0.040)             | 0.395 (0.052)             | 0.318 (0.053)              |
| Asthma control days (# of controlled days per 14 days) | tio/1xbecl0 → 2xbecl0 → salm/1xbecl0 | 3.0 (0.6)                 | 5.6 (0.7)                 | 6.4 (0.7)                  |
|                                                        | tio/1xbecl0 → salm/1xbecl0 → 2xbecl0 | 2.8 (0.6)                 | 9.1 (0.7)                 | 8.7 (0.7)                  |
|                                                        | 2xbecl0 → tio/1xbecl0 → salm/1xbecl0 | 2.0 (0.6)                 | 3.6 (0.7)                 | 3.1 (0.7)                  |
|                                                        | 2xbecl0 → salm/1xbecl0 → tio/1xbecl0 | 2.5 (0.6)                 | 5.6 (0.7)                 | 5.5 (0.7)                  |
|                                                        | salm/1xbecl0 → tio/1xbecl0 → 2xbecl0 | 3.3 (0.6)                 | 6.5 (0.7)                 | 6.1 (0.8)                  |
|                                                        | salm/1xbecl0 → 2xbecl0 → tio/1xbecl0 | 2.0 (0.6)                 | 5.5 (0.7)                 | 4.5 (0.7)                  |
| Pre-Bronchodilator FEV <sub>1</sub> (liters)           | tio/1xbecl0 → 2xbecl0 → salm/1xbecl0 | 2.29 (0.11)               | 2.36 (0.11)               | 2.36 (0.11)                |
|                                                        | tio/1xbecl0 → salm/1xbecl0 → 2xbecl0 | 2.43 (0.14)               | 2.50 (0.14)               | 2.44 (0.14)                |
|                                                        | 2xbecl0 → tio/1xbecl0 → salm/1xbecl0 | 2.17 (0.11)               | 2.23 (0.11)               | 2.33 (0.12)                |
|                                                        | 2xbecl0 → salm/1xbecl0 → tio/1xbecl0 | 2.36 (0.15)               | 2.45 (0.15)               | 2.34 (0.16)                |

|  | <b>Drug Sequence</b>                 | <b>Visit 3<br/>Value (SE)</b> | <b>Visit 7<br/>Value (SE)</b> | <b>Visit 11<br/>Value (SE)</b> |
|--|--------------------------------------|-------------------------------|-------------------------------|--------------------------------|
|  | salm/1xbecl0 → tio/1xbecl0 → 2xbecl0 | 2.23 (0.10)                   | 2.20 (0.10)                   | 2.20 (0.10)                    |
|  | salm/1xbecl0 → 2xbecl0 → tio/1xbecl0 | 2.46 (0.13)                   | 2.46 (0.14)                   | 2.48 (0.14)                    |

138

139 This Table lists the baseline values for AM PEF, Asthma Control Days (in both proportion of controlled days, and controlled days per  
140 14 days), and for pre-bronchodilator FEV<sub>1</sub>, before each treatment period, for each treatment sequence. Carry-over effects were not  
141 observed for AM PEF or pre-bronchodilator FEV<sub>1</sub>, but were observed for Asthma Control Days.

142

143

Table S3. Results of All Outcome Variables

|                                                        | tio/1xbeclo*                   | 2xbeclo*                       | salm/1xbeclo*                  | (Primary Hypothesis)<br>tio/1xbeclo - 2xbeclo** | tio/1xbeclo -<br>salm/1xbeclo** | salm/1xbeclo -<br>2xbeclo**  |
|--------------------------------------------------------|--------------------------------|--------------------------------|--------------------------------|-------------------------------------------------|---------------------------------|------------------------------|
|                                                        | Est (95% CI)<br>P-value        | Est (95% CI)<br>P-value        | Est (95% CI)<br>P-value        | Est (95% CI)<br>P-value                         | Est (95% CI)<br>P-value         | Est (95% CI)<br>P-value      |
| AM Peak Flow (liters/min)                              | 24.4 (16.0,32.7)<br>< 0.001    | -1.4 (-8.4,5.6)<br>0.69        | 18.0 (11.5,24.5)<br>< 0.001    | 25.8 (14.4,37.1)<br>< 0.001                     | 6.4 (-4.8,17.5)<br>0.26         | 19.4 (9.4,29.4)<br>< 0.001   |
| PM Peak Flow (liters/min)                              | 29.6 (21.9,37.3)<br>< 0.001    | -5.7 (-12.3,0.9)<br>0.09       | 19.0 (11.7,26.3)<br>< 0.001    | 35.3 (24.6,46.0)<br>< 0.001                     | 10.6 (-0.1,21.3)<br>0.05        | 24.7 (15.2,34.3)<br>< 0.001  |
| Peak Flow Variability (%)                              | 0.79 (0.23,1.35)<br>0.006      | -1.19 (-1.76,-0.62)<br>< 0.001 | -0.94 (-1.46,-0.43)<br>< 0.001 | 1.98 (1.18,2.78)<br>< 0.001                     | 1.74 (0.98,2.49)<br>< 0.001     | 0.25 (-0.54,1.03)<br>0.54    |
| Albuterol Rescue Use (puffs/day)                       | -0.11 (-0.26,0.03)<br>0.12     | -0.07 (-0.19,0.06)<br>0.30     | -0.16 (-0.28,-0.03)<br>0.01    | -0.05 (-0.24,0.14)<br>0.63                      | 0.04 (-0.13,0.22)<br>0.63       | -0.09 (-0.27,0.09)<br>0.33   |
| Albuterol Rescue Use (times dosed/day)                 | -0.04 (-0.13,0.06)<br>0.44     | -0.08 (-0.17,0.01)<br>0.08     | -0.08 (-0.16,-0.00)<br>0.04    | 0.04 (-0.08,0.16)<br>0.49                       | 0.05 (-0.07,0.16)<br>0.43       | -0.00 (-0.12,0.11)<br>0.94   |
| Nighttime Symptoms (AM Symptom Diary)                  | -0.03 (-0.06,0.00)<br>0.07     | 0.02 (-0.01,0.05)<br>0.21      | -0.00 (-0.04,0.03)<br>0.80     | -0.05 (-0.09,-0.01)<br>0.03                     | -0.02 (-0.07,0.02)<br>0.29      | -0.02 (-0.06,0.02)<br>0.31   |
| Daytime Symptoms (PM Symptom Diary)                    | -0.03 (-0.06,0.01)<br>0.13     | 0.01 (-0.02,0.04)<br>0.56      | -0.03 (-0.06,0.01)<br>0.14     | -0.04 (-0.09,0.01)<br>0.13                      | -0.00 (-0.05,0.05)<br>0.93      | -0.04 (-0.08,0.01)<br>0.15   |
| Daily Symptoms (0 to 3 scale)                          | -0.09 (-0.12,-0.05)<br>< 0.001 | 0.03 (-0.01,0.06)<br>0.11      | -0.04 (-0.08,-0.01)<br>0.02    | -0.11 (-0.16,-0.06)<br>< 0.001                  | -0.04 (-0.09,0.01)<br>0.10      | -0.07 (-0.12,-0.02)<br>0.005 |
| Asthma control days (proportion of controlled days)    | 0.131 (0.090,0.171)<br>< 0.001 | 0.051 (0.010,0.093)<br>0.02    | 0.139 (0.096,0.183)<br>< 0.001 | 0.079 (0.019,0.140)<br>0.01                     | -0.009 (-0.070,0.053)<br>0.78   | 0.088 (0.028,0.148)<br>0.004 |
| Asthma control days (# of controlled days per 14 days) | 1.8 (1.3,2.4)<br>< 0.001       | 0.7 (0.1,1.3)<br>0.02          | 2.0 (1.3,2.6)<br>< 0.001       | 1.1 (0.3,2.0)<br>0.01                           | -0.1 (-1.0,0.7)<br>0.78         | 1.2 (0.4,2.1)<br>0.004       |
| Pre-Bronchodilator FEV <sub>1</sub> (liters)           | 0.12 (0.07,0.17)<br>< 0.001    | 0.02 (-0.03,0.07)<br>0.47      | 0.01 (-0.04,0.06)<br>0.60      | 0.10 (0.03,0.17)<br>0.004                       | 0.11 (0.04,0.18)<br>0.003       | -0.00 (-0.08,0.07)<br>0.89   |
| Pre-Bronchodilator FEV <sub>1</sub> (% predicted)      | 3.73 (2.71,4.76)<br>< 0.001    | 0.63 (-0.28,1.54)<br>0.17      | 0.64 (-0.32,1.60)<br>0.19      | 3.10 (1.74,4.47)<br>< 0.001                     | 3.10 (1.78,4.41)<br>< 0.001     | 0.01 (-1.31,1.33)<br>0.99    |

|                                                              | <b>tio/1xbecl<sup>*</sup></b>   | <b>2xbecl<sup>*</sup></b>       | <b>salm/1xbecl<sup>*</sup></b>  | <b>(Primary Hypothesis)<br/>tio/1xbecl - 2xbecl<sup>**</sup></b> | <b>tio/1xbecl -<br/>salm/1xbecl<sup>**</sup></b> | <b>salm/1xbecl -<br/>2xbecl<sup>**</sup></b> |
|--------------------------------------------------------------|---------------------------------|---------------------------------|---------------------------------|------------------------------------------------------------------|--------------------------------------------------|----------------------------------------------|
|                                                              | <b>Est (95% CI)<br/>P-value</b> | <b>Est (95% CI)<br/>P-value</b> | <b>Est (95% CI)<br/>P-value</b> | <b>Est (95% CI)<br/>P-value</b>                                  | <b>Est (95% CI)<br/>P-value</b>                  | <b>Est (95% CI)<br/>P-value</b>              |
| ASUI Score                                                   | 0.03 (0.01,0.05)<br>0.004       | 0.00 (-0.02,0.02)<br>0.77       | 0.04 (0.03,0.06)<br>< 0.001     | 0.03 (-0.00,0.06)<br>0.09                                        | -0.01 (-0.04,0.02)<br>0.38                       | 0.04 (0.01,0.07)<br>0.005                    |
| Shortened (without FEV <sub>1</sub> % predicted) ACQ Average | -0.18 (-0.30,-0.06)<br>0.005    | -0.02 (-0.13,0.09)<br>0.67      | -0.35 (-0.45,-0.25)<br>< 0.001  | -0.16 (-0.33,0.02)<br>0.08                                       | 0.17 (0.01,0.33)<br>0.04                         | -0.33 (-0.48,-0.18)<br>< 0.001               |
| ACQ Average                                                  | -0.22 (-0.33,-0.11)<br>< 0.001  | -0.03 (-0.13,0.06)<br>0.49      | -0.31 (-0.40,-0.22)<br>< 0.001  | -0.18 (-0.34,-0.03)<br>0.02                                      | 0.09 (-0.04,0.23)<br>0.18                        | -0.28 (-0.41,-0.15)<br>< 0.001               |
| AQLQ Average                                                 | 0.15 (0.03,0.26)<br>0.01        | 0.05 (-0.06,0.15)<br>0.38       | 0.28 (0.18,0.38)<br>< 0.001     | 0.10 (-0.07,0.27)<br>0.24                                        | -0.13 (-0.28,0.02)<br>0.09                       | 0.23 (0.09,0.37)<br>0.002                    |
| Ventricular Heart Rate (beats/min)                           | 4.83 (3.38,6.27)<br>< 0.001     | 2.86 (1.51,4.22)<br>< 0.001     | 3.46 (1.93,5.00)<br>< 0.001     | 1.96 (-0.03,3.96)<br>0.05                                        | 1.36 (-0.71,3.43)<br>0.20                        | 0.60 (-1.36,2.56)<br>0.55                    |
| FEV <sub>1</sub> Post-Albuterol (4 puffs) (liters)           | 0.02 (-0.01,0.05)<br>0.16       | -0.02 (-0.05,0.01)<br>0.11      | -0.05 (-0.08,-0.03)<br>< 0.001  | 0.04 (0.01,0.08)<br>0.01                                         | 0.07 (0.05,0.10)<br>< 0.001                      | -0.03 (-0.06,0.00)<br>0.06                   |
| FEV <sub>1</sub> Albuterol (4 puffs) Reversal (%)            | -5.81 (-7.15,-4.47)<br>< 0.001  | -2.83 (-4.08,-1.59)<br>< 0.001  | -6.40 (-7.82,-4.98)<br>< 0.001  | -2.98 (-4.37,-1.59)<br>< 0.001                                   | 0.59 (-0.64,1.82)<br>0.34                        | -3.57 (-5.01,-2.13)<br>< 0.001               |
| Natural log(FENO) (ppb)                                      | 0.07 (-0.01,0.15)<br>0.07       | -0.06 (-0.14,0.02)<br>0.12      | -0.05 (-0.14,0.03)<br>0.18      | 0.13 (0.05,0.22)<br>0.003                                        | 0.13 (0.05,0.21)<br>0.002                        | 0.01 (-0.07,0.09)<br>0.84                    |
| Sputum over-read EOS                                         | 0.51 (-0.13,1.14)<br>0.12       | 0.20 (-0.40,0.81)<br>0.51       | 0.31 (-0.28,0.90)<br>0.30       | 0.30 (-0.33,0.94)<br>0.35                                        | 0.20 (-0.36,0.76)<br>0.49                        | 0.11 (-0.56,0.77)<br>0.75                    |
| Exhaled Breath Condensate pH                                 | -0.30 (-0.48,-0.13)<br>< 0.001  | -0.11 (-0.27,0.04)<br>0.16      | -0.14 (-0.30,0.02)<br>0.08      | -0.19 (-0.38,-0.00)<br>0.05                                      | -0.16 (-0.34,0.02)<br>0.09                       | -0.03 (-0.19,0.13)<br>0.71                   |

\* Model-based estimates representing the average of the change between the end and the beginning of each of the three treatment periods.  
\*\* Differences between treatments using the model-based estimates.

144

145 Restricted maximum likelihood estimates were determined for the treatment effects (the model-based change between the end and  
146 the beginning of each of the three treatment periods). The primary comparison between tio/1xbecl vs. 2xbecl for AM PEF showed  
147 the treatment with tio/1xbecl to be 25.8 L/min superior to 2xbecl (95% confidence interval, [CI] 14.4,37.1;P<0.001). Similar

148 results favoring tio/1xbeclo were obtained for PM PEF, pre-bronchodilator FEV<sub>1</sub>, proportion of Asthma Control Days (ACDs), daily  
149 symptoms, ACQ score, and FEV<sub>1</sub> after 4 puffs of albuterol. The secondary comparison between tio/1xbeclo vs. salm/1xbeclo showed  
150 no significant difference between groups for AM PEF, PM PEF, proportion of ACDs, daily symptoms, and ACQ score. Pre-  
151 bronchodilator FEV<sub>1</sub> favored tio/1xbeclo 0.11 L (CI 0.04,0.18;P=0.003), as did FEV<sub>1</sub> after 4 puffs of albuterol 0.07 L (CI  
152 0.05,0.10;P<0.001). The null hypothesis of inferiority was rejected in favor of the alternative hypothesis of non-inferiority at the  
153 0.025 significance level for AM PEF, pre-bronchodilator FEV<sub>1</sub>, and the proportion of ACDs. The comparison between salm/1xbeclo  
154 vs. 2xbeclo showed that treatment with sal/1xbeclo is superior to 2xbeclo in terms of AM PEF, PM PEF, proportion of ACDs, daily  
155 symptoms, ACQ score, ASUI score, and AQLQ score. Scores on the Asthma Control Questionnaire (ACQ) range between 0 and 6,  
156 with lower score indicating better asthma control; minimal clinically important difference (MID) is 0.5. Asthma Symptom Utility  
157 Index (ASUI) scores range between 0 and 1, with higher score indicating better asthma control; MID unknown but a difference of 0.3  
158 is suggested to distinguish between mild/moderate and moderate/severe asthma. Asthma-specific quality of life (AQLQ) scores  
159 range between 1 and 7, with higher score indicating better asthma quality of life; MID is 0.5.  
160

161

**Table S4. Reasons for Patient Withdrawals from TALC**

162

|                                  | <b>tio/1xbecl</b> | <b>2xbecl</b> | <b>salm/1xbecl</b> |
|----------------------------------|-------------------|---------------|--------------------|
| TOTAL RANDOMIZED                 | 189               | 195           | 195                |
| TOTAL DROP-OUTS                  | 7                 | 14            | 15                 |
| Withdrew Consent                 | 3                 | 10            | 10                 |
| Lost to follow-up                | 2                 | 2             | 3                  |
| Medication-related adverse event | 1                 | 1             | 0                  |
| Ineligible post-randomization    | 0                 | 1             | 0                  |
| Other reason                     | 1                 | 0             | 2                  |

163

164 This Table lists reasons for patient withdrawals from TALC. As far as could be determined, no  
 165 participant withdrew from TALC because of the FDA advisory concerning tiotropium and stroke,  
 166 with the subsequent revision of the informed consent document, and appropriate counseling of  
 167 study participant.

168
